# Supplementary material for: In situ electron paramagnetic resonance: a unique tool for analyzing structure–reactivity relationships in heterogeneous catalysis
Source: Royal Society of Chemistry journal article supplement (doi:10.1039/b919541f), 2010-01-01
Supplement: b919541f.pdf [file b919541f.pdf]

Supporting information for the paper

## In situ Electron Paramagnetic Resonance: A unique tool for analyzing structure-reactivity relationships in heterogeneous catalysis

by Angelika Brückner

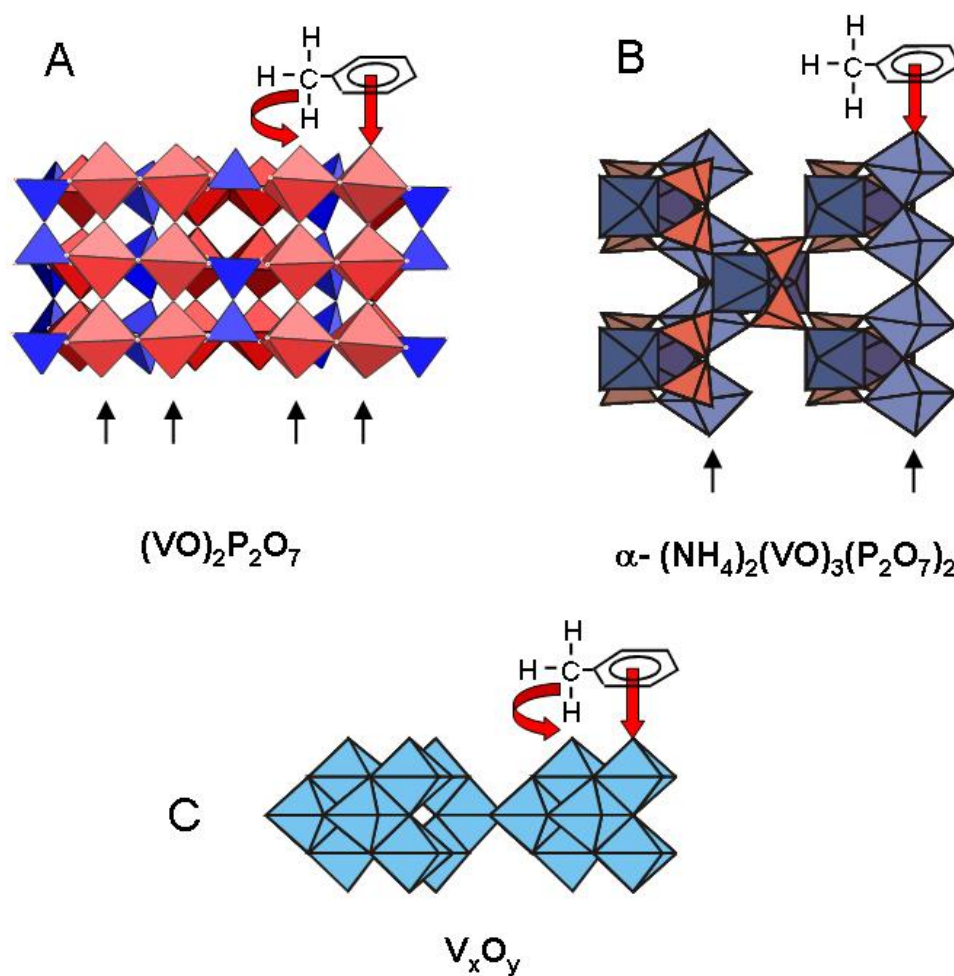

**Figure S1.** Schematic depiction of the adsorption of the toluene molecule on the structure of  $(\text{VO})_2\text{P}_2\text{O}_7$ ,  $\alpha\text{-(NH}_4)_2(\text{VO})_3(\text{P}_2\text{O}_7)_2$  and  $\text{V}_x\text{O}_y$  clusters assuming  $\text{V}_2\text{O}_5$  structure. The distance of the chains of  $\text{VO}^{2+}$  octahedra in the crystal structure (marked by arrows) fits the distance between the centre of the aromatic ring and the C-atom of the methyl group only in cases A and C but not in case B. This is assumed as one reason why crystalline  $\alpha\text{-(NH}_4)_2(\text{VO})_3(\text{P}_2\text{O}_7)_2$  is catalytically inactive.

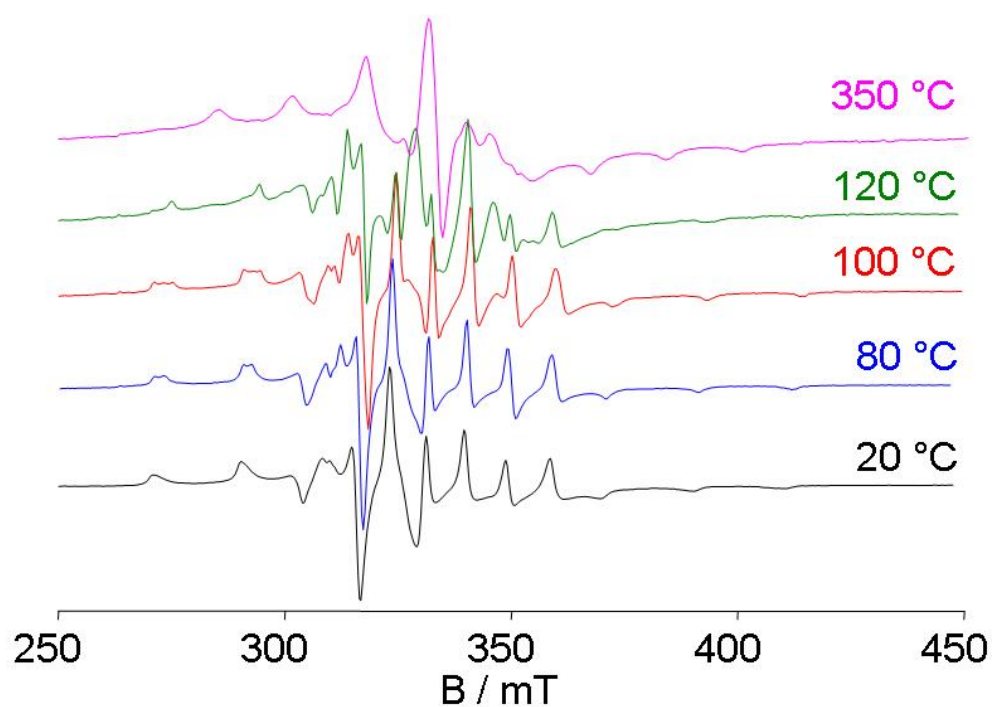

**Figure S2.** Complete in situ-EPR spectra of  $\text{H}_4\text{PVMo}_{11}\text{O}_{40} \cdot x \text{H}_2\text{O}$  during heating in  $\text{N}_2$  flow.
